# American Psychiatric Association Publishing Textbook of Psychopharmacology, Fifth Edition

Edited by Alan F. Schatzberg, M.D., and Charles B. Nemeroff, M.D., Ph.D.

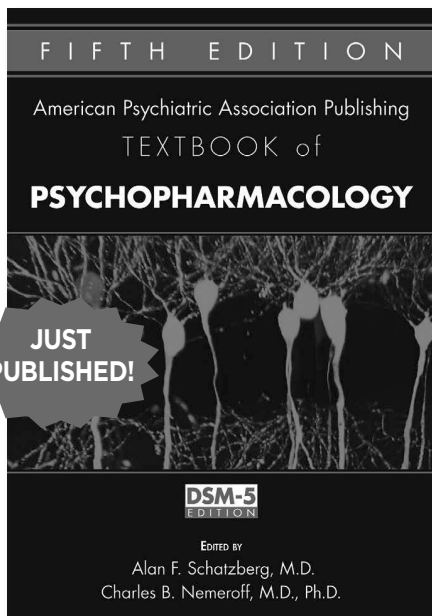

The *American Psychiatric Association Publishing Textbook of Psychopharmacology* is an indispensable and comprehensive resource for clinicians and trainees who prescribe psychotropic medications. Updated to reflect the new DSM-5 classification, this revised Fifth Edition maintains the user-friendly structure of its predecessors while offering in-depth coverage of the latest research in pharmacological principles, classes of drugs, and psychiatric disorders. Introductory chapters provide a theoretical grounding in clinical applications, with topics ranging from neurotransmitters to brain imaging in psychopharmacology. The bulk of the book is devoted to various classes of drugs, including antidepressants, anxiolytics, antipsychotics, mood stabilizers, and other agents, with each class divided into chapters on specific drugs—either new or revised to include the latest findings and trends.

Finally, the section on psychopharmacological treatment addresses evidence-based principles of clinical care for the full spectrum of mental disorders and conditions as well as for specific populations and circumstances—offering information on topics such as medication selection, combination and maintenance dosing regimens, monitoring and management of side effects, and strategies for optimizing treatment response.

## The book's beneficial features are many:

- The section on principles of pharmacology has been revised and reorganized to incorporate recent discoveries from the fields of neurobiology, genetics, brain imaging, and epidemiology.
- History and discovery, structure-activity relationships, pharmacological profiles, pharmacokinetics and disposition, mechanisms of action, indications and efficacy, side effects and toxicology, and drug-drug interactions are addressed for each agent. This consistent structure places the desired information at the clinician's fingertips and facilitates study for trainees.
- Coverage of drugs approved since the last edition is thorough, encompassing new antidepressants (e.g., vortioxetine), new antipsychotics (e.g., cariprazine), and agents on the clinical horizon (e.g., ketamine).

A work of uncommon scientific rigor and clinical utility, *The American Psychiatric Association Publishing Textbook of Psychopharmacology* provides state-of-the-art information on both the principles and the practice of psychopharmacological treatment of psychiatric disorders.

2017 • 1,823 pages • ISBN 978-1-58562-523-9 • Hardcover • \$299.00 • Item #62523

2017 • 1,823 pages • ISBN 978-1-61537-122-8 • eBook • \$240.00 • Item #37122

AMERICAN  
PSYCHIATRIC  
ASSOCIATION  
PUBLISHING

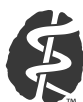

[www.appi.org](http://www.appi.org)

Email: [appi@psych.org](mailto:appi@psych.org)

Toll Free: 1-800-368-5777

20% Discount for American Psychiatric Association Members  
25% Discount for APA Resident-Fellow Members

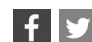

Priority Code AH1713

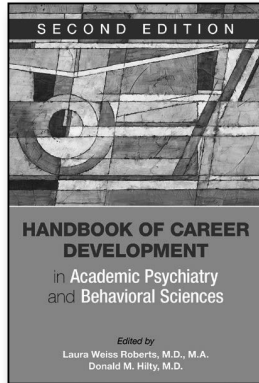

## Handbook of Career Development in Academic Psychiatry and Behavioral Sciences, Second Edition

Edited by Laura Weiss Roberts, M.D., M.A., and Donald M. Hilty, M.D.

*The Handbook of Career Development in Academic Psychiatry and Behavioral Sciences, Second Edition, provides real-world advice with compassion. Readers will find just what they need when they need it: step-by-step guidance to approaching the tasks and challenges that face them, questions to discuss with mentors and colleagues, and professionally vetted online career development resources.*

2017 • 437 pages • ISBN 978-1-61537-058-0 • Paperback • \$69.00 • Item #37058

2017 • 437 pages • ISBN 978-1-61537-123-5 • eBook • \$55.00 • Item #37123

## Basics of Psychotherapy

A Practical Guide to Improving Clinical Success

Richard B. Makover, M.D.

*Basics of Psychotherapy* is written in a clear, straightforward style that reads easily and conveys its ideas with engaging simplicity. Every point is skillfully illustrated by clinical examples. Scripted excerpts of therapy sessions not only reproduce the dialogue, they also contain notes and commentary that explain exactly what is happening between therapist and patient. Tables and illustrations summarize the topics explained in the text. This practical and up-to-date book should be of use to the beginning therapist and the experienced clinician alike.

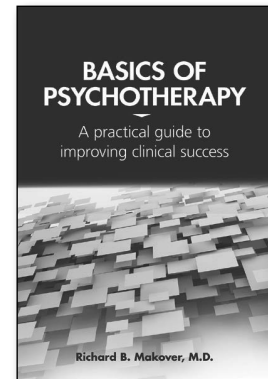

2017 • 332 pages • ISBN 978-1-61537-076-4 • Paperback • \$59.00 • Item #37076

2017 • 332 pages • ISBN 978-1-61537-132-7 • eBook • \$47.00 • Item #37132

Order Now [www.appi.org](http://www.appi.org)

20% Discount for American Psychiatric Association Members  
25% Discount for APA Resident-Fellow Members

Please use Priority Code AH1737 when ordering.

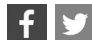

AMERICAN  
PSYCHIATRIC  
ASSOCIATION  
PUBLISHING

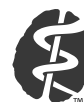

[www.appi.org](http://www.appi.org)

Email: [appi@psych.org](mailto:appi@psych.org)

Toll Free: 1-800-368-5777

**Psychiatric Services** (ISSN 1075-2730; online version, 1557-9700) is published monthly by the American Psychiatric Association, editorial and executive office, 1000 Wilson Blvd., Suite 1825, Arlington, VA 22209-3901. Copyright © 2016 by the American Psychiatric Association. Printed in U.S.A. Periodicals postage paid at Arlington, VA, and at additional mailing offices. POSTMASTER: Send address changes to **Psychiatric Services, 1000 Wilson Blvd., Suite 1825, Arlington, VA 22209-3901.**

"DMH is an excellent starting point for anyone coming out of a residency or fellowship program. It is very low anxiety, you know what the practice is going to be like, and it's a great group of people to work with."  
**Michael Fitzpatrick, M.D.**  
 Child & Adolescence Psychiatrist, Juvenile Justice

## UNLIMITED GROWTH OPPORTUNITIES

Los Angeles County has immediate openings with Antelope Valley, Correctional Health Services, Juvenile Halls and Probation Camps, and directly operated programs. This is your chance to join one of the nation's leading mental health agencies and work in a safe, diverse, and challenging environment. The County is filled with opportunities for professional development and growth, including new full-time and part-time psychiatrist positions.

**LAC DMH**  
 LOS ANGELES COUNTY MENTAL HEALTH

[www.psychiatristjobs.la](http://www.psychiatristjobs.la)

- ✓ Competitive starting salaries and benefits
- ✓ Potential Bonuses up to \$30,000\* a year
- ✓ Up to 24 hours/wk for outside employment

\*Depending on qualifications and placement.

"DMH provides you with long term job security. They offer great benefits with the opportunity for you to work in different settings. There are several variety/flexible work schedules and most do not include after hours or weekends."  
**Romana Zvereva, M.D.**  
 Mental Health Psychiatrist

## FREE Online Subscription to *Psychiatric Services* for APA Resident-Fellow Members (RFMs)!

American Psychiatric Association Resident-Fellow Members (RFMs) can receive a free online subscription to *Psychiatric Services*.

Simply visit [ps.psychiatryonline.org](http://ps.psychiatryonline.org) for full-text access to all of the content of APA's highly ranked, peer-reviewed monthly journal.

*Psychiatric Services* focuses on service delivery in organized systems of care, evolving best practices, and federal and state policies that affect the care of people with mental illnesses.

**Please visit [ps.psychiatryonline.org](http://ps.psychiatryonline.org) and log in with your American Psychiatric Association username and password.**

Psychiatry residents who are not currently APA Resident-Fellow Members should consider membership in the American Psychiatric Association. The benefits provided to residents are an example of how the APA serves the needs of its members throughout their careers. The low introductory dues APA extends to RFMs are even waived for the first year. Please visit [www.psychiatry.org/join-apa](http://www.psychiatry.org/join-apa) for more information.

The screenshot shows the journal's website interface with a search bar, navigation menu, and article highlights. A smartphone in the foreground displays the journal's mobile app interface, showing a list of articles and a featured article titled "A Plea for Evidence-Based Treatment".

# New Titles on Integrated Care

Just Published!

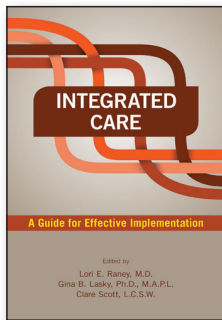

## *Integrated Care* *A Guide for Effective Implementation*

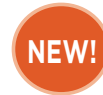

Edited by Lori E. Raney, M.D., Gina B. Lasky, Ph.D., M.A.P.L.,  
and Clare Scott, L.C.S.W.

This book provides a detailed, thoughtful, and experience-based guide to the complex and potentially overwhelming process of implementing an integrated care program. The advantages of integrated care from both the clinical and administrative perspectives are many, including better detection of illness, improvement in overall health outcomes, a better patient care experience, and flexibility in responding to policy and financial changes. The book addresses the emerging framework of core principles for effective integrated care, reviews the most up-to-date research on implementation, and presents practice-based experience to serve as a guide. This information is useful in both traditional integration of behavioral health into general medical settings or integrating general medical care into a specialty mental health or substance use treatment setting. Because administrators, clinicians, policy makers, payers and others need guidance in determining what effective implementation looks like, the authors offer a three-part examination of the key components of an implementation strategy and explore the elements essential for success.

2017 • 290 pages • ISBN 978-1-61537-054-2 • Paperback • \$59.00 • Item #37054  
2017 • 290 pages • ISBN 978-1-61537-133-4 • eBook • \$47.00 • Item #37133

## *Study Guide to Preventive Medical Care in Psychiatry* *A Case Approach*

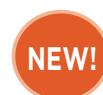

Edited by Robert M. McCarron, D.O., Glen L. Xiong, M.D., Craig R. Keenan, M.D.,  
Lorin M. Scher, M.D., Jaesu Han, M.D., and Mark E. Servis, M.D.

*Study Guide to Preventive Medical Care in Psychiatry: A Case Approach* is an indispensable companion to *Preventive Medical Care in Psychiatry: A Practical Guide for Clinicians*. Like the primary text, the study guide was written by experts in the field and it reflects the text's focus on clinical care for psychiatrists and other mental health care providers who work in outpatient mental health and integrated clinics. Through the deft use of clinical cases, the study guide helps providers and trainees acquire the knowledge and skills necessary to view the patient holistically and improve outcomes.

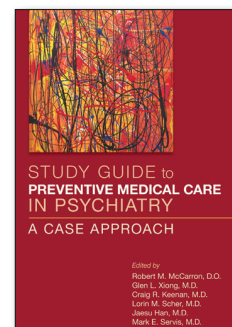

2017 • 313 pages • ISBN 978-1-61537-057-3 • Paperback • \$59.00 • Item #37057  
2017 • 313 pages • ISBN 978-1-61537-116-7 • eBook • \$47.00 • Item #37116

Order Now [www.appi.org](http://www.appi.org)

20% Discount for American Psychiatric Association Members  
25% Discount for APA Resident-Fellow Members

Please use Priority Code AH1737 when ordering.

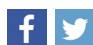

AMERICAN  
PSYCHIATRIC  
ASSOCIATION  
PUBLISHING

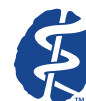

[www.appi.org](http://www.appi.org)  
Email: [appi@psych.org](mailto:appi@psych.org)  
Toll Free: 1-800-368-5777
