# Psychiatric Services

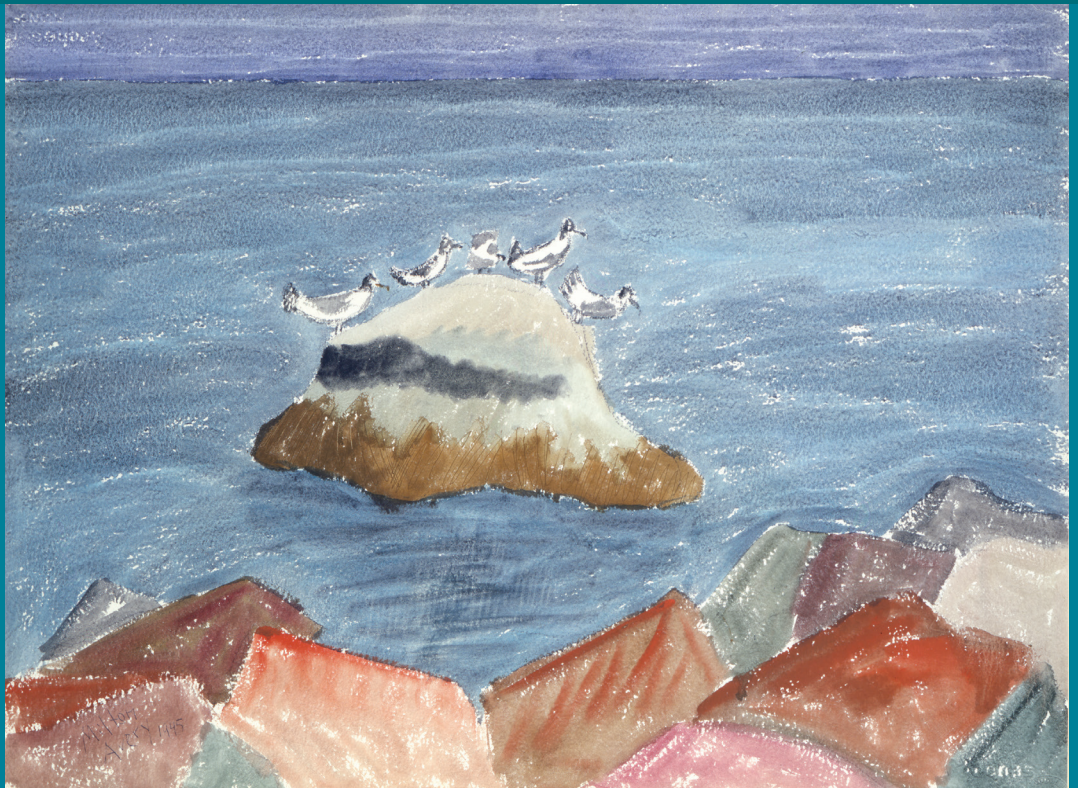

ACA: characteristics of the still uninsured

“Docs vs. Glocks” and the regulation of physicians’ speech

Depression screening: patterns and counterargument

Using computer tablets to aid children’s psychotherapy
